# Supplementary material for: When should healthcare workers with COVID-19 return to work? An analysis of follow-up antigen test results after a positive COVID test
Source: bioRxiv or medRxiv preprint supplement (doi:10.1101/2022.09.24.22280327), 2022-09-25
Supplement: Supplementary file [file media-1.pdf]

## Employee Return-to-Work Timeline following a Positive COVID-19 Test

- This timeline is applicable to employees who completed a self-attestation, received a red boarding pass, and were tested for COVID-19 at a Carilion Testing Center.
- Employees are responsible for following the steps below and updating their manager as they move through the process.

Day 0 is the date of initial positive PCR or antigen test collection

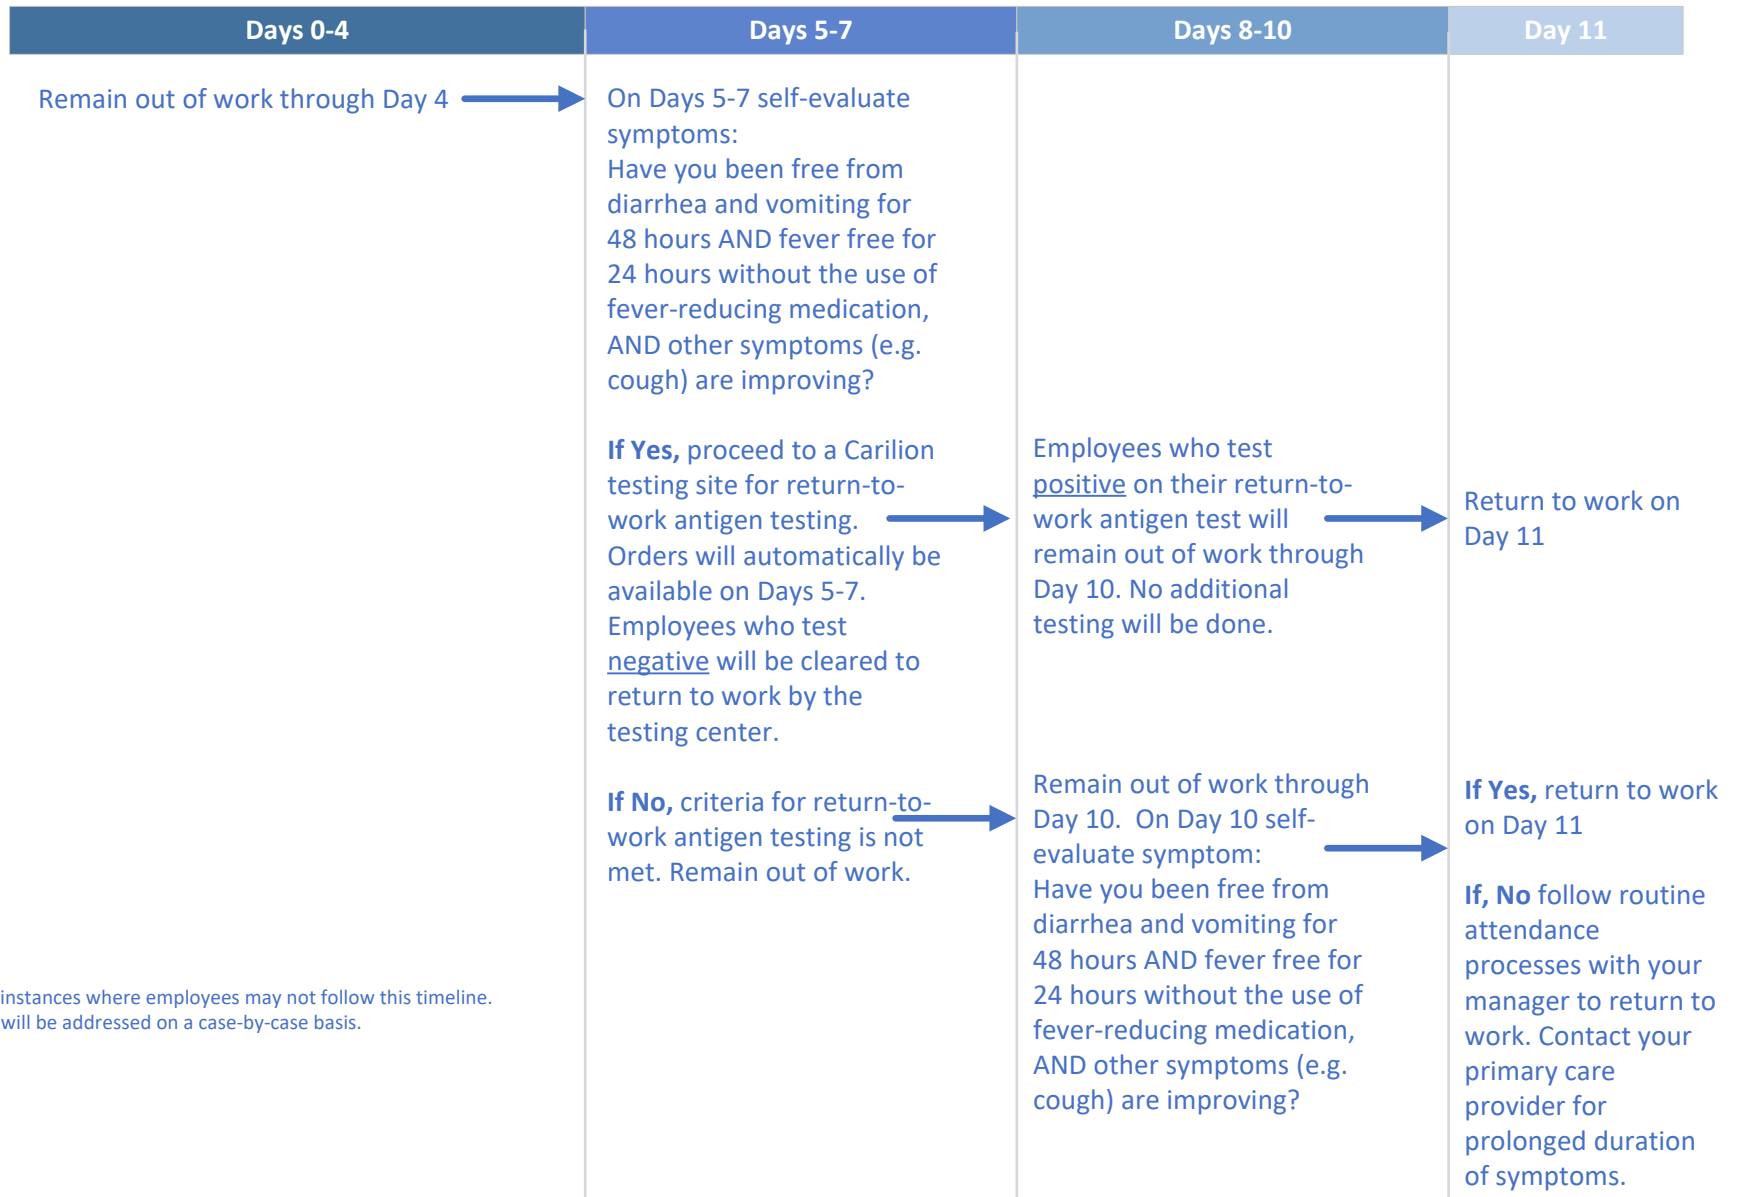

Note: There may be instances where employees may not follow this timeline. They will be addressed on a case-by-case basis.
